# Supplementary material for: A two-electron transfer mechanism of the Zn-doped δ-MnO2 cathode toward aqueous Zn-ion batteries with ultrahigh capacity
Source: Royal Society of Chemistry journal article supplement (doi:10.1039/d1ta10864f), 2022-01-01
Supplement: d1ta10864f1.pdf [file d1ta10864f1.pdf]

## Supplementary Information

### **A Two-electron Transfer Mechanism of Zn-doped $\delta$ -MnO<sub>2</sub> Cathode toward Aqueous Zn-ion Batteries with Superhigh Capacity**

*Wen Zhao<sup>1</sup>, Jared Fee<sup>2</sup>, Harshul Khanna<sup>1</sup>, Seth March<sup>2</sup>, Nathaniel Nisly<sup>2</sup>, Samantha Joy B.*

*Rubio<sup>2</sup>, Can Cui<sup>1</sup>, Zhuo Li<sup>3</sup> and Steven L. Suib<sup>1, 2, \*</sup>*

1. Department of Materials Science and Engineering & Institute of Materials Science, University of Connecticut, 97 N. Eagleville Rd., Storrs, Connecticut 06269-3136, United States

2. Department of Chemistry, University of Connecticut, 55 N. Eagleville Rd., Storrs, Connecticut 06269-3060, United States

3. Department of Materials Science and Engineering, Huazhong University of Science and Technology, Wuhan 430074, P. R. China.

\* Email: [steven.suib@uconn.edu](mailto:steven.suib@uconn.edu)

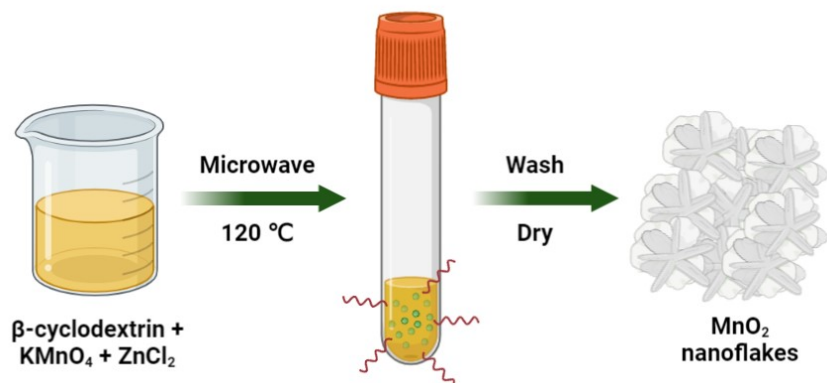

**Figure S1.** The simplified schematic fabrication process of Zn-doped  $\delta$ -MnO<sub>2</sub>.

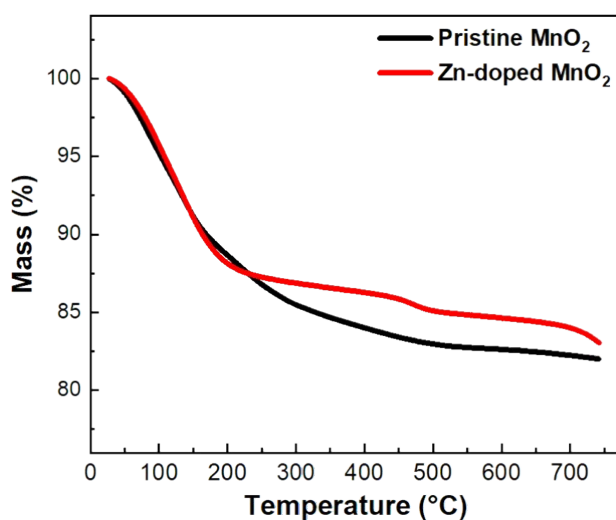

**Figure S2.** TGA profiles of pristine and Zn-doped MnO<sub>2</sub> samples from 27 to 750 °C.

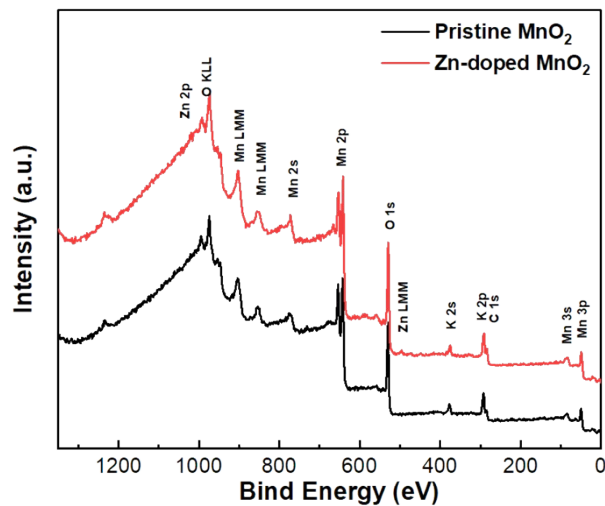

**Figure S3.** Full-scan XPS spectra of pristine and Zn-doped MnO<sub>2</sub>.

**Table S1.** XRF analysis results of pristine and Zn-doped MnO<sub>2</sub> samples.

| Samples                   | Mol % K | Mol % Mn | Mol % Zn | Formula                                                |
|---------------------------|---------|----------|----------|--------------------------------------------------------|
| Pristine MnO <sub>2</sub> | 18.9%   | 81.1%    | 0        | K <sub>0.19</sub> MnO <sub>2</sub>                     |
| Zn-doped MnO <sub>2</sub> | 18.3%   | 80.3%    | 1.4%     | K <sub>0.18</sub> Zn <sub>0.014</sub> MnO <sub>2</sub> |

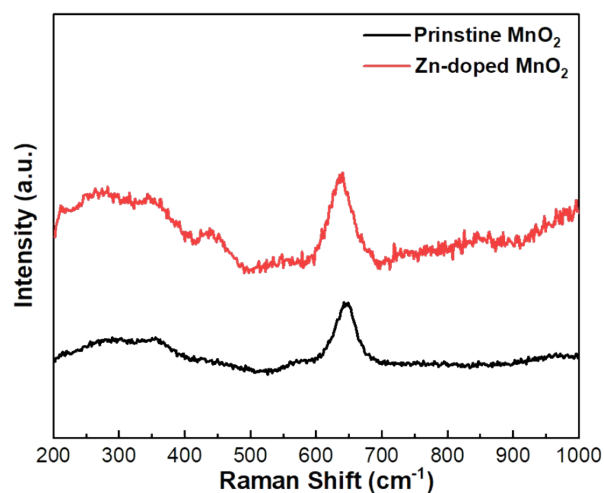

**Figure S4.** Raman spectra of pristine and Zn-doped MnO<sub>2</sub> materials.

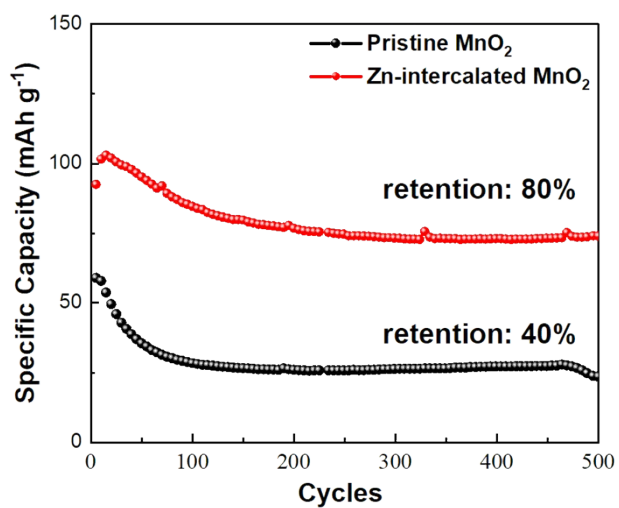

**Figure S5.** Cycling performance of pristine and Zn-doped MnO<sub>2</sub> ZIBs at 200 mA g<sup>-1</sup> for 500 cycles.

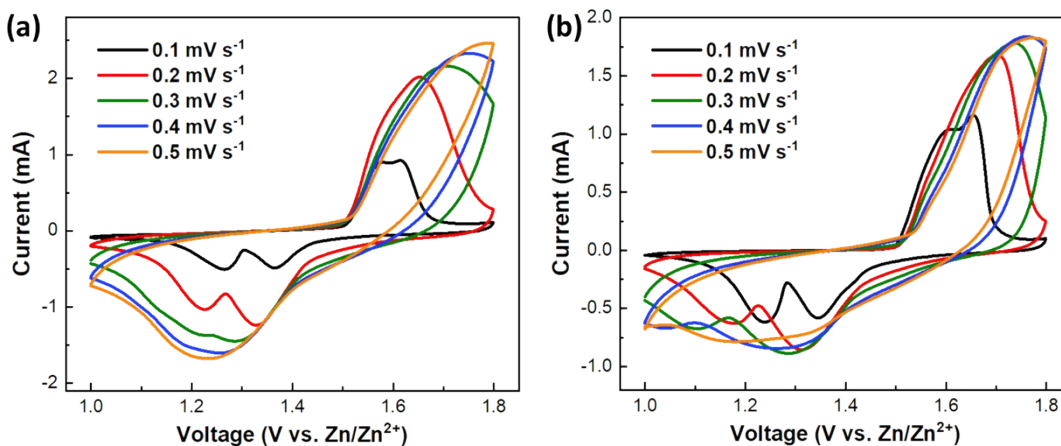

**Figure S6.** CV curves of (a) Zn-doped MnO<sub>2</sub> and (b) pristine MnO<sub>2</sub> ZIBs at various scan rates.

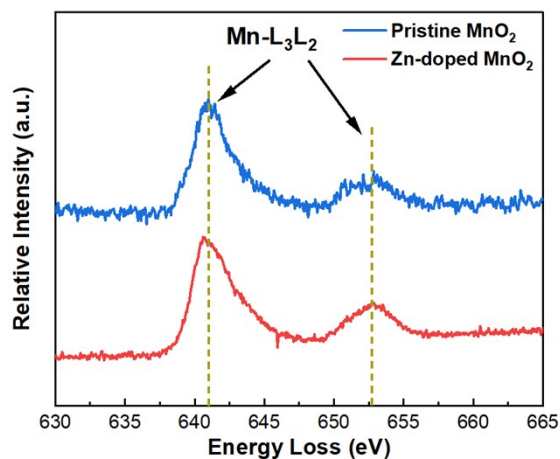

**Figure S7.** The EELS profiles of manganese L<sub>2,3</sub> edges of pristine and Zn-doped MnO<sub>2</sub> cathodes discharged to 1V.

Fig. S7 shows electron energy-loss spectroscopy (EELS) spectra of pristine and Zn-doped MnO<sub>2</sub> cathodes discharged to V5 (1.0 V). In general, the excitation edges shift to lower energy-loss for a lower oxidation state and the integral intensity ratio of L<sub>3</sub> and L<sub>2</sub> excitation peaks of Mn is correlated to its oxidation state. Compared to the standard Mn<sup>4+</sup> spectrum, the L<sub>3</sub> peak maximum exhibits lower energy losses (Zn-doped MnO<sub>2</sub>: 640.95 eV; pristine MnO<sub>2</sub>: 641.05 eV), and the I(L<sub>3</sub>)/I(L<sub>2</sub>) white line intensity ratios (Zn-doped MnO<sub>2</sub>: 3.50; pristine MnO<sub>2</sub>: 3.46) correspond to a mixed valency of Mn<sup>2+</sup> and Mn<sup>3+</sup>, confirming the existence of Mn<sup>2+</sup> in electrodes.<sup>1,2</sup>

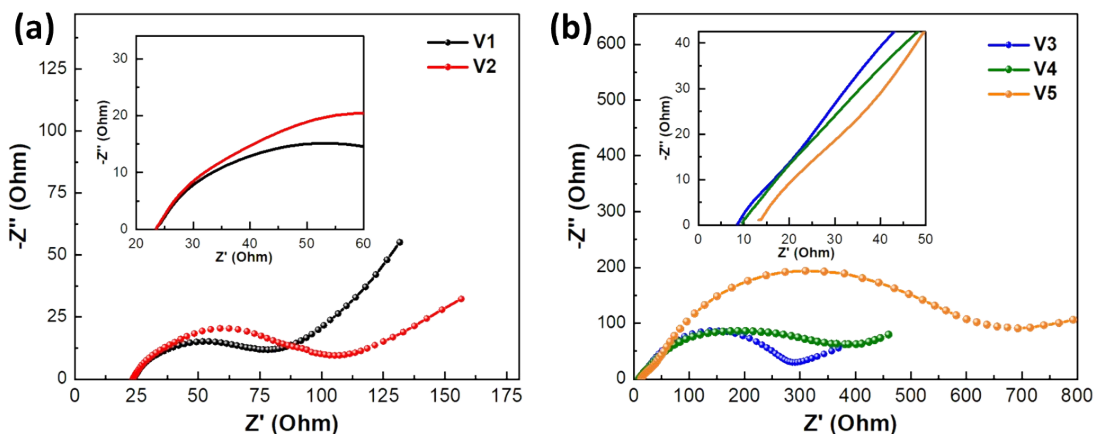

**Figure S8.** Nyquist plots of Zn-doped MnO<sub>2</sub> ZIBs at different voltages vs. Zn<sup>2+</sup>/Zn: (a) V1 (1.8 V) and V2 (1.44 V); (b) V3 (1.31 V), V4 (1.28 V) and V5 (1.0 V)

Compared with the charge transfer resistance ( $R_{ct}$ ) at OCV ( $\sim 1.5$  V vs Zn<sup>2+</sup>/Zn), the  $R_{ct}$  at 1.31 V became larger in Zn-doped MnO<sub>2</sub> ZIBs, while the  $R_{ct}$  of pristine MnO<sub>2</sub> ZIBs decreased slightly. To evaluate the ohmic resistance changes with voltage changes, we performed EIS on Zn-doped MnO<sub>2</sub> ZIBs at different voltages. Fig. S6a shows the Nyquist plots of Zn-doped MnO<sub>2</sub> ZIBs at V1-V5. The ohmic resistance of ZIBs increased with both H<sup>+</sup> and Zn<sup>2+</sup> insertion. The smaller  $R_{ct}$  at 1.31 V than that at OCV in pristine MnO<sub>2</sub> ZIBs may be due to the intercalation of Zn ions into the  $\delta$ -MnO<sub>2</sub> crystal structure, which is similar to the role of zinc doping.

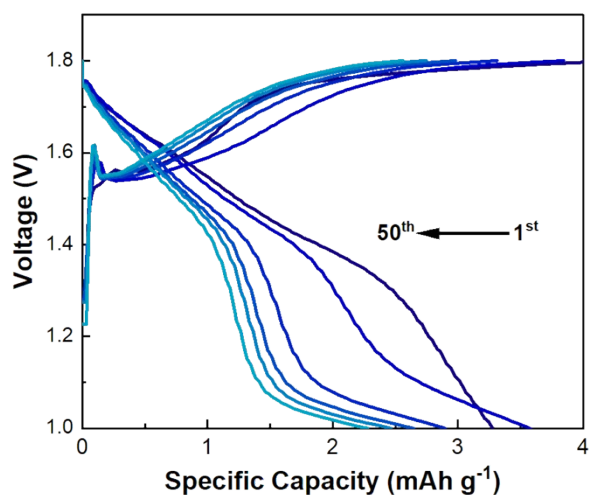

**Figure S9.** Charge/discharge curves of cathode-free ZIBs for 50 cycles at a low current of 0.06 mA.

## Calculation of the theoretical capacity

The theoretical capacity is calculated using the equation:

$$C_t = \frac{nF}{3600 \times M} \quad (1)$$

Where  $n$  is the number of electrons involved in the electrochemical reactions,  $F$  is Faraday Constant (96485.34 C mol<sup>-1</sup>), and  $M$  is molecular weight (g mol<sup>-1</sup>).

## Calculation of the specific energy

Due to the excess Zn foil anode, ZIBs use the mass of active cathode materials to calculate the energy density. The equation is provided below:

$$E = \frac{\int_0^{t_{cutoff}} (V(t) \times i) dt}{3600} \quad (2)$$

where  $V(t)$  is voltage (function of time, V),  $i$  is the current density (mA g<sup>-1</sup>), and  $t_{cutoff}$  is the cutoff time. Graphically, it is the area under the voltage vs. specific capacity curve.

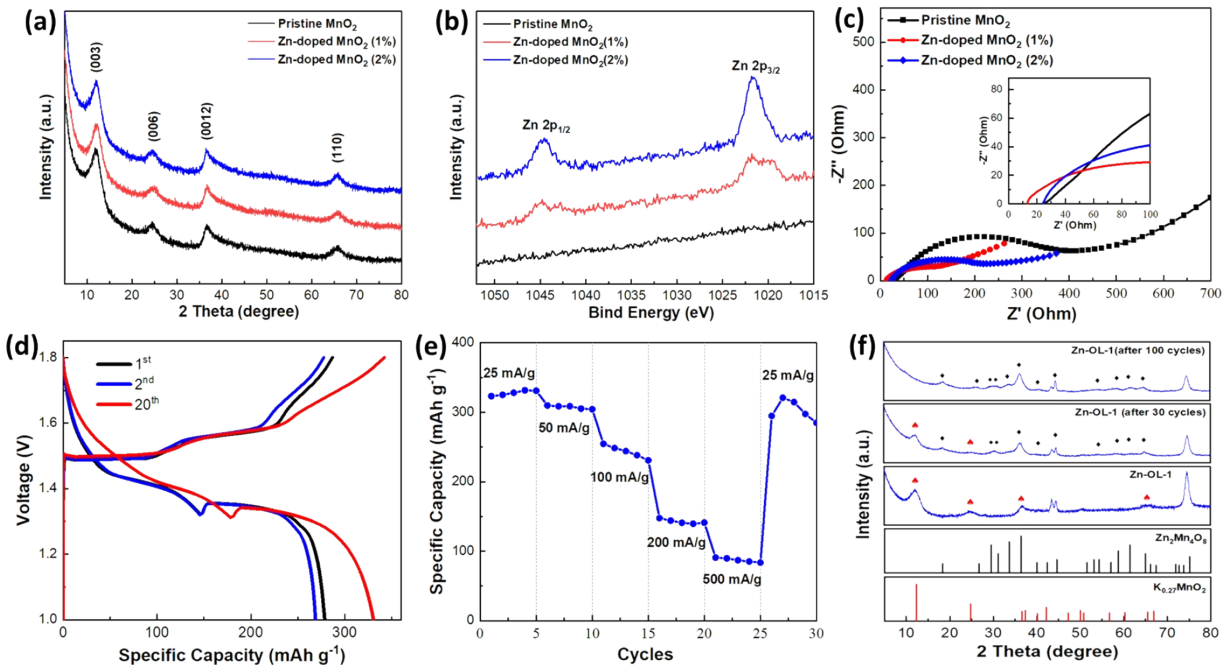

**Figure S10.** (a) XRD patterns, (b) high-resolution Zn 2p XPS spectra, (c) Nyquist plots of pristine, 1 % and 2% Zn-doped  $\delta$ -MnO<sub>2</sub>. (d) Discharge-charge profiles and (e) rate performance of 2% Zn-doped MnO<sub>2</sub> ZIBs. (f) XRD patterns of 2% Zn-doped MnO<sub>2</sub> cathodes at the 30th and 100th discharged states.

We prepared pure  $\delta$ -MnO<sub>2</sub>, 1% and 2% Zn doped  $\delta$ -MnO<sub>2</sub>. Fig. S10a shows the XRD patterns of all three materials and 2% Zn doped MnO<sub>2</sub> has the similar crystallographic structure as both pristine and 1% Zn doped MnO<sub>2</sub>. The high-resolution Zn 2p spectra in Fig. S10b confirm the increasing amount of Zn doping in 2% doped MnO<sub>2</sub> samples. Additionally, the amount of Zn doping in 2% doped samples was evaluated to be 2.7 mol % by XRF characterization, which is higher than that in 1% Zn doped samples (1.4 mol %). EIS data in Fig. S10c indicates that 1% doped MnO<sub>2</sub> cathode has the smallest electron transfer resistance ( $R_{ct}$ ) and the highest ion diffusion rate, which should provide the best reaction kinetics. For 2% doped MnO<sub>2</sub> ZIBs, a maximum discharge capacity of 331 mAh g<sup>-1</sup> was achieved after 20 cycles at 25 mA g<sup>-1</sup>, as shown in Fig. S10d. The highest specific capacity and the rate performance (Fig. S10e) of 2% doped MnO<sub>2</sub> ZIBs are better than that of pristine MnO<sub>2</sub> ZIBs, but inferior to that of 1% Zn-doped MnO<sub>2</sub> ZIBs. Moreover, the XRD patterns of 2% doped MnO<sub>2</sub> cathodes at discharged states after different cycles in Fig. S10f show that the birnessite MnO<sub>2</sub> phase is still retained after 30 cycles of charge/discharge procedures, but is completely transferred to Zn<sub>2</sub>Mn<sub>4</sub>O<sub>8</sub> after 100 cycles. Based on the characterization of materials and electrochemical measurement results, the content of Zn in the Zn-doped MnO<sub>2</sub> sample was optimized to be 1%.

**Table S2.** Comparison of electrochemical performances of the Zn-doped MnO<sub>2</sub> cathodes with reported cathode materials in aqueous zinc-ion batteries.

| Cathode                                                         | Electrolyte                                                                        | Potential (V) | Specific Capacity (mAh g <sup>-1</sup> ) | Specific Energy (Wh Kg <sup>-1</sup> ) | Ref.      |
|-----------------------------------------------------------------|------------------------------------------------------------------------------------|---------------|------------------------------------------|----------------------------------------|-----------|
| Zn-doped MnO <sub>2</sub>                                       | 2 M ZnSO <sub>4</sub> +0.2 M MnSO <sub>4</sub>                                     | 1.0-1.8       | 455                                      | 628                                    | This work |
| $\alpha$ -(Mn <sub>2</sub> O <sub>3</sub> -MnO <sub>2</sub> )   | 2 M ZnSO <sub>4</sub> +0.15 M MnSO <sub>4</sub>                                    | 0.9-1.9       | 183                                      | 187.5                                  | 3         |
| Cu <sub>3</sub> (HHTP) <sub>2</sub>                             | 3M Zn(CF <sub>3</sub> SO <sub>3</sub> ) <sub>2</sub>                               | 0.5-1.5       | 228                                      | –                                      | 4         |
| (NH <sub>4</sub> ) <sub>2</sub> V <sub>10</sub> O <sub>25</sub> | 3M Zn(CF <sub>3</sub> SO <sub>3</sub> ) <sub>2</sub>                               | 0.4-1.5       | 408                                      | 287                                    | 5         |
| MnO/C@rGO                                                       | 2 M ZnSO <sub>4</sub> +0.1 M MnSO <sub>4</sub>                                     | 0.8-1.9       | 315                                      | –                                      | 6         |
| $\delta$ -MnO <sub>2</sub>                                      | ZnSO <sub>4</sub> -based gel electrolyte                                           | 0-2.0         | 324                                      | 531                                    | 7         |
| K <sub>0.8</sub> Mn <sub>8</sub> O <sub>16</sub>                | 2 M ZnSO <sub>4</sub> +0.1 M MnSO <sub>4</sub>                                     | 1.0-1.9       | 317                                      | 436                                    | 8         |
| $\alpha$ -K <sub>1.33</sub> Mn <sub>8</sub> O <sub>16</sub>     | 2 M ZnSO <sub>4</sub> +0.1 M MnSO <sub>4</sub>                                     | 0.8-1.9       | 320                                      | 398                                    | 9         |
| $\delta$ -MnO <sub>2</sub> /Graphite                            | 1 M ZnSO <sub>4</sub>                                                              | 1.0-1.8       | 235                                      | –                                      | 10        |
| Defect-enriched MnO <sub>2</sub>                                | 2 M ZnSO <sub>4</sub> +0.1 M MnSO <sub>4</sub>                                     | 1.0-1.9       | 388                                      | 406                                    | 11        |
| $\gamma$ -MnO <sub>2</sub>                                      | 1 Zn(CH <sub>3</sub> COO) <sub>2</sub> +0.4 Mn(CH <sub>3</sub> COO) <sub>2</sub>   | 1.0-1.8       | 556                                      | –                                      | 12        |
| $\epsilon$ -MnO <sub>2</sub>                                    | 2 M ZnSO <sub>4</sub> +1 M MnSO <sub>4</sub> +0.1 M H <sub>2</sub> SO <sub>4</sub> | 1.0-1.95      | 570                                      | 409                                    | 13        |
| $\epsilon$ -MnO <sub>2</sub>                                    | 2.5 M H <sub>2</sub> SO <sub>4</sub> +0.5 M MnSO <sub>4</sub>                      | 1.0-2.8       | 616                                      | 1621.7                                 | 14        |

The (–) symbol signifies that the information has not been reported.

**Table S3.** The fitted results of electrolyte resistance (R<sub>s</sub>) and charge-transfer resistance (R<sub>ct</sub>) of pristine and Zn-doped MnO<sub>2</sub> ZIBs. OCV: open circuit voltage

| Samples                   |                                 | R <sub>s</sub> | R <sub>ct</sub> |
|---------------------------|---------------------------------|----------------|-----------------|
| Pristine MnO <sub>2</sub> | OCV                             | 25.4           | 407.4           |
|                           | 1.31 V vs. Zn <sup>2+</sup> /Zn | 12.3           | 348.4           |
| Zn-doped MnO <sub>2</sub> | OCV                             | 11.6           | 132.3           |
|                           | 1.31 V vs. Zn <sup>2+</sup> /Zn | 8.9            | 294.2           |



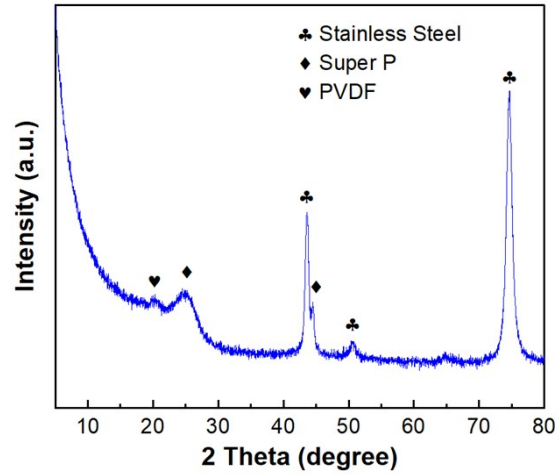

Figure S11. XRD patterns of the reference electrode with Super P and PVDF coated on the stainless-steel substrate.

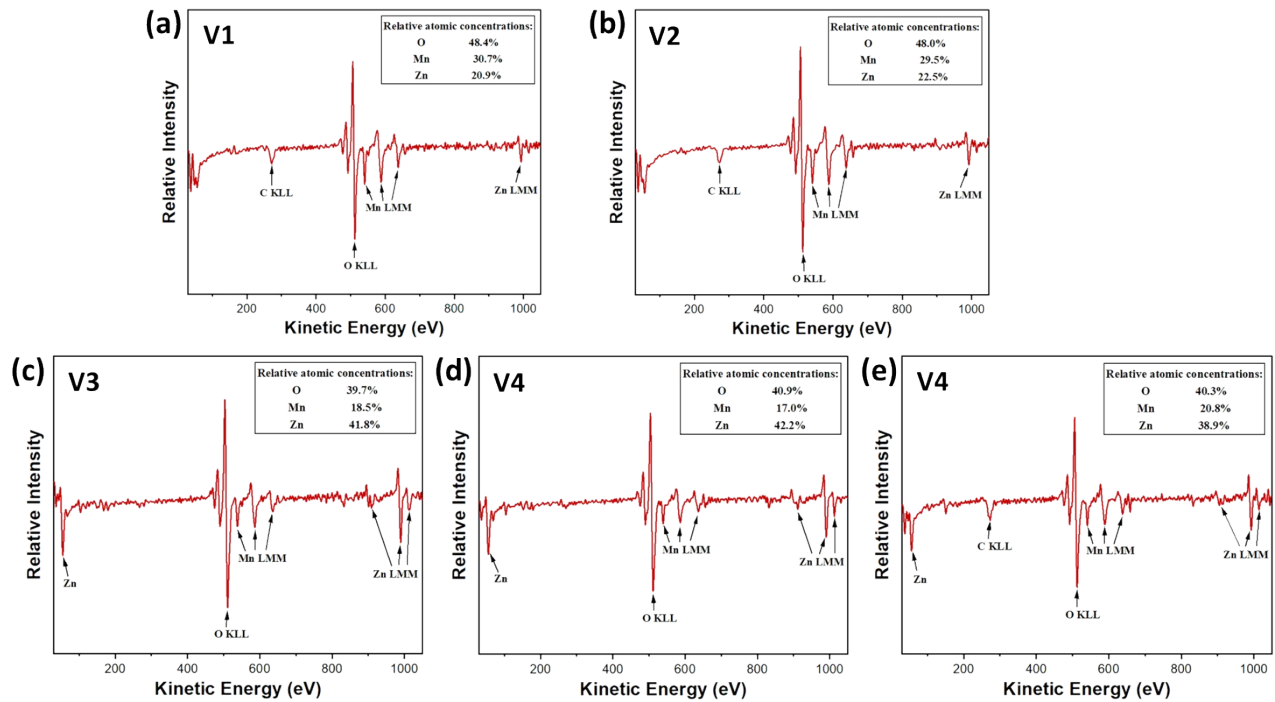

Figure S12. Relative atomic concentration of Zn-doped  $\text{MnO}_2$  cathodes at different states via AES.

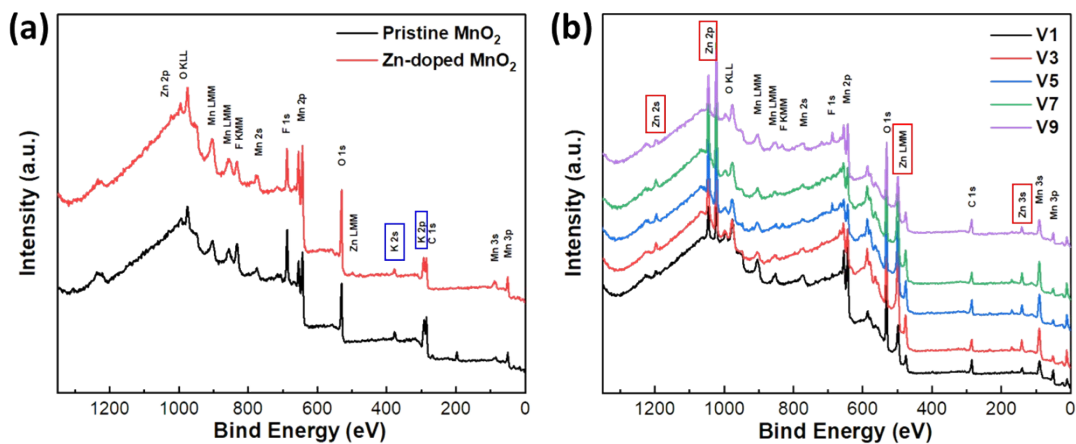

**Figure 13.** (a) Full-scan XPS spectra of pristine and Zn-doped  $\text{MnO}_2$  cathodes. (b) Full-scan XPS spectra of Zn-doped  $\text{MnO}_2$  cathodes at different states.

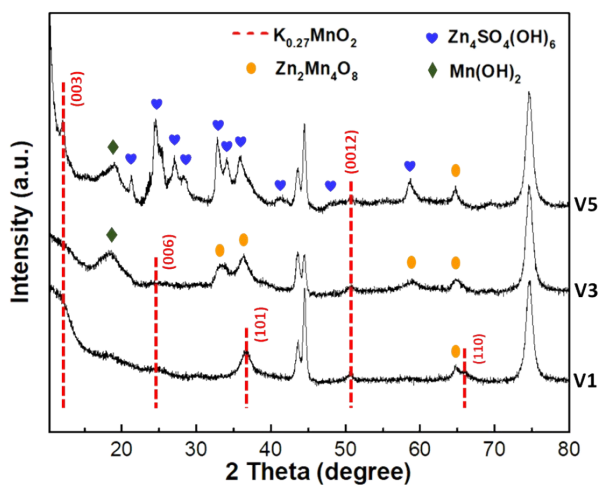

**Figure S14.** *Ex situ* XRD patterns of pristine  $\text{MnO}_2$  cathodes during the discharge process.

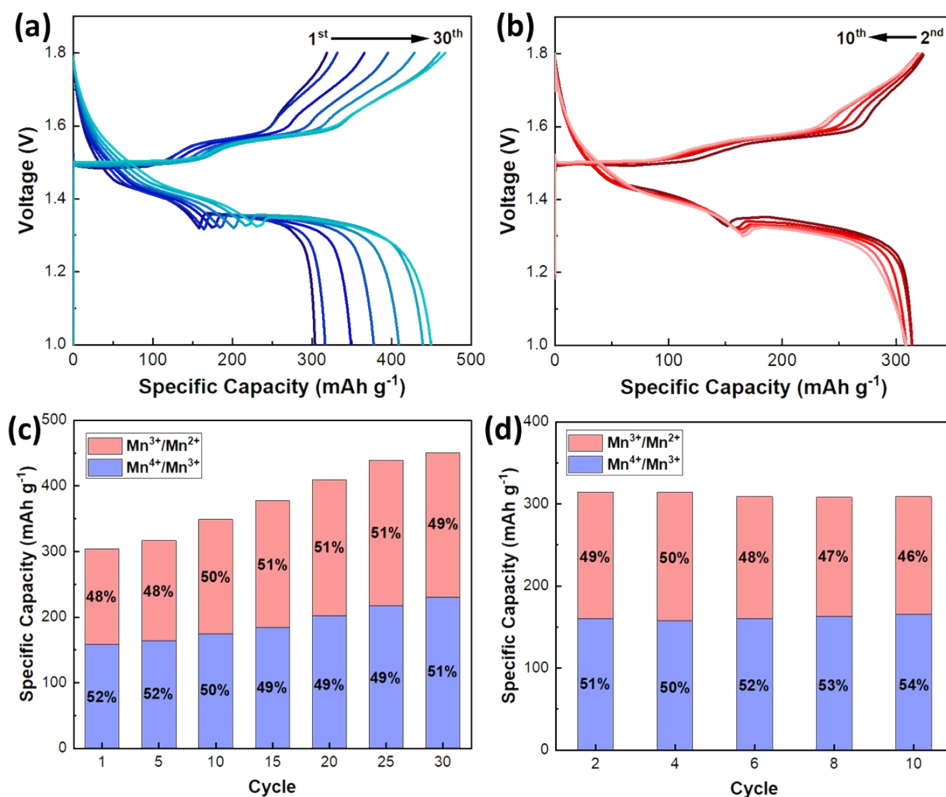

**Figure S15.** Galvanostatic charge/discharge curves of (a) Zn-doped MnO<sub>2</sub> ZIBs for first 30 cycles and (b) pristine MnO<sub>2</sub> ZIBs for first 10 cycles. Bar chart showing the percentage of capacity contribution of Mn<sup>4+</sup>/Mn<sup>3+</sup> and Mn<sup>3+</sup>/Mn<sup>2+</sup> redox reactions of (c) Zn-doped MnO<sub>2</sub> ZIBs and (d) pristine MnO<sub>2</sub> ZIBs.

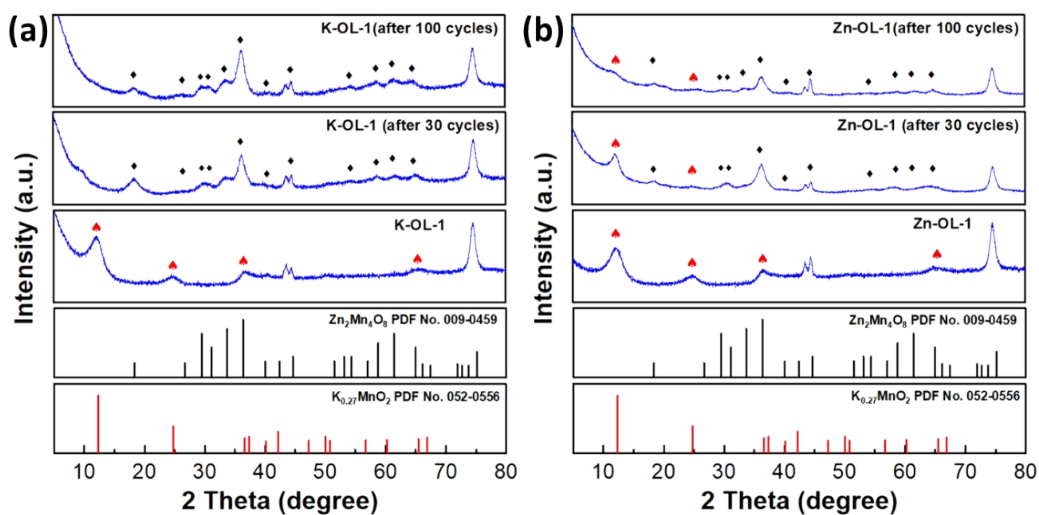

**Figure S16.** XRD patterns of (a) pristine MnO<sub>2</sub> cathodes and (b) Zn-doped MnO<sub>2</sub> cathodes at the 30<sup>th</sup> and 100<sup>th</sup> discharged states.

## References

- 1 H. Tan, J. Verbeeck, A. Abakumov and G. Van Tendeloo, *Ultramicroscopy*, 2012, **116**, 24–33.
- 2 S. Zhang, K. J. Livi, A. C. Gaillot, A. T. Stone, D. R. Veblen, *American Mineralogist*, 2010, **95(11-12)**, 1741-1746.
- 3 J. Long, F. Yang, J. Cuan, J. Wu, Z. Yang, H. Jiang, R. Song, W. Song, J. Mao and Z. Guo, *ACS Appl. Mater. Interfaces*, 2020, **12**, 32526–32535.
- 4 K. W. Nam, S. S. Park, R. dos Reis, V. P. Dravid, H. Kim, C. A. Mirkin and J. F. Stoddart, *Nat. Commun.*, 2019, **10**, 1–10.
- 5 J. Cao, D. Zhang, Y. Yue, X. Wang, T. Pakornchote, T. Bovornratanaraks, X. Zhang, Z. S. Wu and J. Qin, *Nano Energy*, 2021, **84**, 105876.
- 6 F. Tang, J. Gao, Q. Ruan, X. Wu, X. Wu, T. Zhang, Z. Liu, Y. Xiang, Z. He and X. Wu, *Electrochim. Acta*, 2020, **353**, 136570.
- 7 Y. Jiang, D. Ba, Y. Li and J. Liu, *Adv. Sci.*, 2020, DOI:10.1002/advs.201902795.
- 8 J. Wang, J. G. Wang, H. Liu, Z. You, Z. Li, F. Kang and B. Wei, *Adv. Funct. Mater.*, 2021, DOI:10.1002/adfm.202007397.
- 9 G. Fang, C. Zhu, M. Chen, J. Zhou, B. Tang, X. Cao, X. Zheng, A. Pan and S. Liang, *Adv. Funct. Mater.*, 2019, **29**, 1–9.
- 10 S. Khamsanga, R. Pornprasertsuk, T. Yonezawa, A. A. Mohamad and S. Kheawhom, *Sci. Rep.*, 2019, **9**, 1–9.
- 11 J. Wang, J. G. Wang, X. Qin, Y. Wang, Z. You, H. Liu and M. Shao, *ACS Appl. Mater. Interfaces*, 2020, **12**, 34949–34958.
- 12 X. Zeng, J. Liu, J. Mao, J. Hao, Z. Wang, S. Zhou, C. D. Ling and Z. Guo, *Adv. Energy Mater.*, 2020, **10**, 1–9.
- 13 D. Chao, W. Zhou, C. Ye, Q. Zhang, Y. Chen, L. Gu, K. Davey and S. Z. Qiao, *Angew. Chemie - Int. Ed.*, 2019, **58**, 7823–7828.
- 14 C. Zhong, B. Liu, J. Ding, X. Liu, Y. Zhong, Y. Li, C. Sun, X. Han, Y. Deng, N. Zhao and W. Hu, *Nat. Energy*, 2020, **5**, 440–449.
